# Supplementary material
Source: PubMed Central journal article supplement (PMC8556717)
Supplement: NIHMS1736283-supplement-1.pdf [file NIHMS1736283-supplement-1.pdf]

Supplemental Figure 1

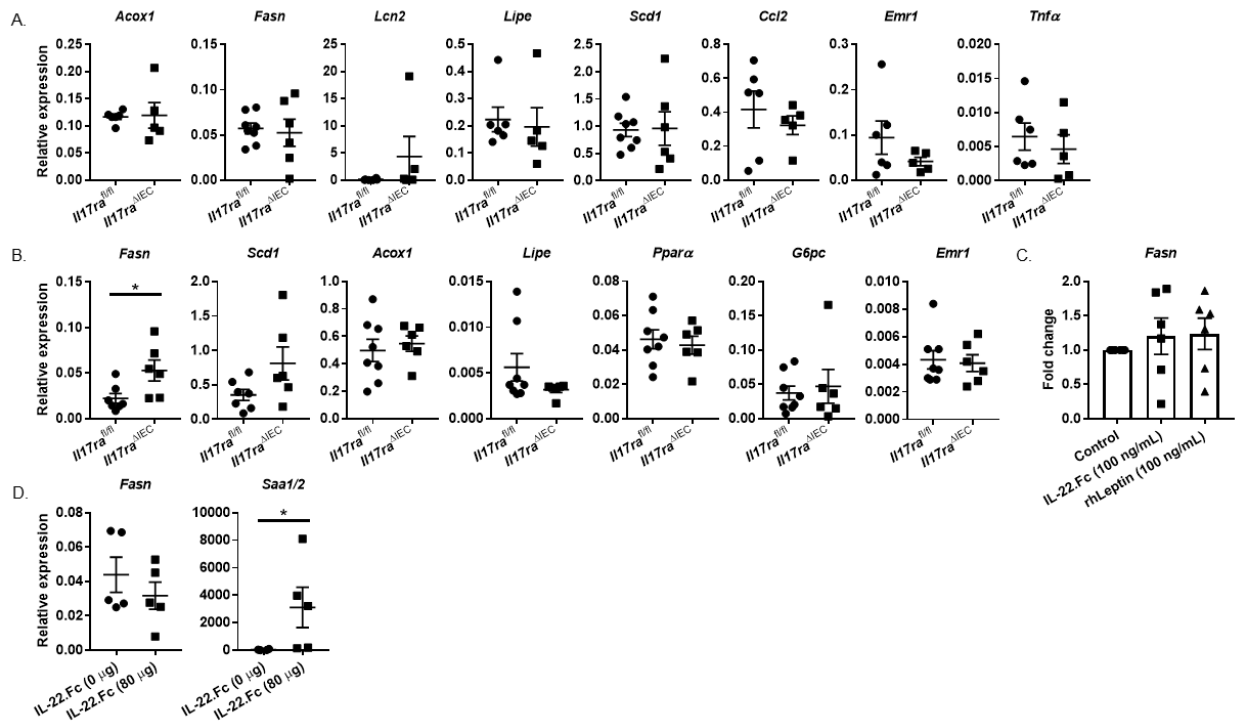

**Supplemental Figure 1.** Analysis of extra-intestinal metabolic and inflammatory genes from *Il17ra<sup>fl/fl</sup>* and *Il17ra<sup>ΔIEC</sup>* mice. A) RT-PCR data from eWAT of HFD-fed mice. B) RT-PCR data from liver tissues of HFD-fed mice. C) RT-PCR analysis from HepG2 cells treated with nothing, 100 ng/mL IL-22.Fc, or 100 ng/mL rhLeptin for 28 hours. D) RT-PCR analysis of liver tissues collected from C57BL/6J mice 24 hours after intraperitoneal injection with pure PBS or 80 μg of IL-22.Fc. All data is based on results obtained from at least two separate experiments. For all graphs, error bars depict the mean ± SEM. Whitney test Two-tailed, Two-way ANOVA, \*p < 0.05.

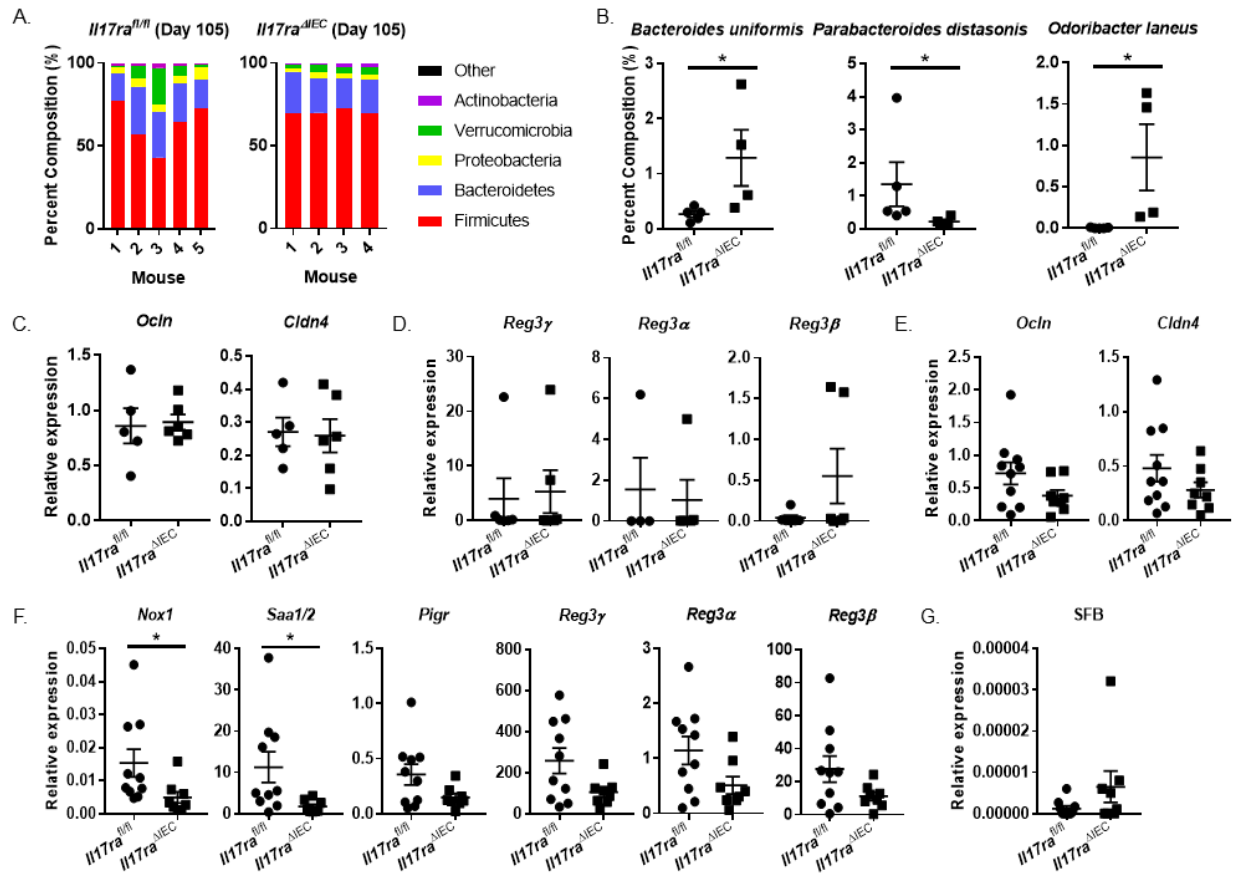

**Supplemental Figure 2.** Analysis of intestinal microbiota composition and gene expression from *Il17ra<sup>fl/fl</sup>* and *Il17ra<sup>AIEC</sup>* mice. A) Phyla and species-level 16s rRNA sequencing data collected from fecal samples. RT-PCR analysis of B) tight junction and C) antimicrobial genes from the distal colon of mice fed 16 weeks of HFD. RT-PCR analysis of D) tight junction and E) antimicrobial genes and F) SFB levels from the terminal ileum of mice fed 1 week of HFD. All data is based on results obtained from at least two separate experiments. For all graphs, error bars depict the mean  $\pm$  SEM. Mann Whitney test Two-tailed, \* $p < 0.05$ .

Supplemental Figure 3

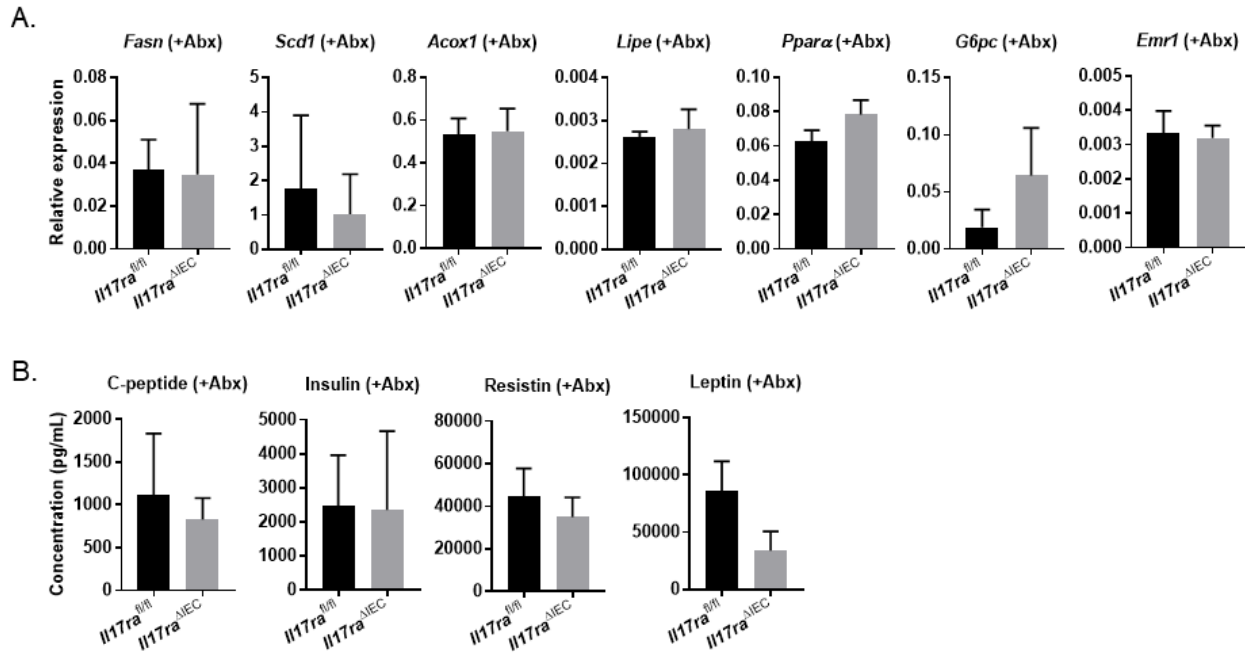

**Supplemental Figure 3.** Effects of intestinal microbiota depletion in *Il17ra<sup>fl/fl</sup>* and *Il17ra<sup>ΔIEC</sup>* mice. A) RT-PCR analysis of the expression of hepatic genes and B) Luminex analysis of serum hormone levels from mice treated with 16 weeks of HFD and an antibiotic cocktail starting on week 12. Error bars depict the mean  $\pm$  SD. Mann Whitney test Two-tailed.

Supplemental Table 1

| Vendor                      | Gene          | Code/ Primer Sequence                                                             |
|-----------------------------|---------------|-----------------------------------------------------------------------------------|
| Applied Biosystem           | <i>Hprt</i>   | Mm00446968_m1                                                                     |
|                             | <i>Cldn4</i>  | Mm00515514_s1                                                                     |
|                             | <i>Ocln</i>   | Mm00500912_m1                                                                     |
|                             | <i>Reg3a</i>  | Mm01181787_m1                                                                     |
|                             | <i>Reg3γ</i>  | Mm.PT.58.1275735                                                                  |
|                             | <i>Saa1/2</i> | Mm04208126_mH                                                                     |
|                             | <i>Tnfa</i>   | Mm.PT.58.12575861                                                                 |
| Integrated DNA Technologies | <i>Gapdh</i>  | Forward: 5'-TCATCAACGGGAAGCCCATCAC-3'<br>Reverse: 5'-AGACTCCACGACATACTCAGCACCG-3' |
|                             | <i>Acox1</i>  | Forward: 5'-CGCACATCTTGGATGGTAGT-3'<br>Reverse: 5'-GGCTTCGAGTGAGGAAGTTATAG-3'     |
|                             | <i>Emr1</i>   | Forward: 5'-CCCCAGTGTCTTACAGAGTG-3'<br>Reverse: 5'-GTGCCAGAGTGGATGTCT-3'          |
|                             | <i>Fasn</i>   | Forward: 5'-AGCGGCCATTTCCATTGCCC-3'<br>Reverse: 5'-CCATGCCAGAGGGTGGTTG-3'         |
|                             | <i>G6pc</i>   | Forward: 5'-TCTGTCCC GGATCTACCTTG-3'<br>Reverse: 5'-GCTGGCAAAGGGTGTAGTGT-3'       |
|                             | <i>Lcn2</i>   | Forward: 5'-GGGAAATATGCACAGGTATCCTC-3'<br>Reverse: 5'-CATGGCGAACTGGTTGTAGTC-3'    |
|                             | <i>Lipe</i>   | Forward: 5'-CATCAACCACTGTGAGGGTAAG-3'<br>Reverse: 5'-AAGGGAGGTGAGATGGTAACT-3'     |
|                             | <i>Ppara</i>  | Forward: 5'-TTTCGGCGAACTATTCGGCTG-3'<br>Reverse: 5'-GGCATTGTCCGGTTCTTCTT-3'       |
|                             | <i>Pparγ</i>  | Forward: 5'-AGGCGAGGGCGATCTTGACAG-3'<br>Reverse: 5'-AATTCGGATGGCCACCTCTTTG-3'     |
|                             | <i>Reg3β</i>  | Forward: 5'-GTGTCCTCCAGGCCTCTTT-3'<br>Reverse: 5'-ATGGCTCCTACTGCTATGCC-3'         |
|                             | <i>Scd1</i>   | Forward: 5'-GAGGCCTGTACGGGATCATA-3'<br>Reverse: 5'-TGAGAGAAGAAGAAGCCACGG-3'       |
|                             | Eubacteria    | Forward: 5'-ACTCCTACGGGAGGCAGCAGT-3'<br>Reverse: 5'-ATTACCGCGGCTGCTGGC-3'         |
|                             | SFB           | Forward: 5'-GACGCTGAGGCATGAGAGCAT-3'<br>Reverse: 5'-GACGGCACGGATTGTTATTCA-3'      |

Supplemental Table 1. List of RT-PCR primers utilized.
